# Supplementary material for: Eltrombopag inhibits the proliferation of Ewing sarcoma cells via iron chelation and impaired DNA replication
Source: PubMed Central journal article supplement (PMC7706234; doi:10.1186/s12885-020-07668-6), 2020-11-30
Supplement: 12885_2020_7668_MOESM1_ESM.pdf [file 12885_2020_7668_MOESM1_ESM.pdf]

# Supplementary Figure 1

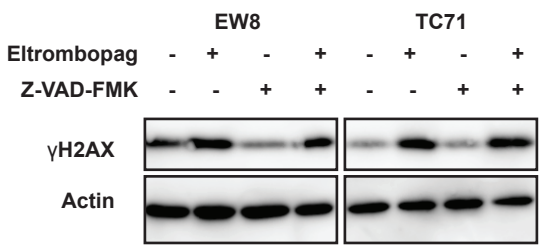

+
