# Supplementary material for: Eltrombopag inhibits the proliferation of Ewing sarcoma cells via iron chelation and impaired DNA replication
Source: PubMed Central journal article supplement (PMC7706234; doi:10.1186/s12885-020-07668-6), 2020-11-30

**Supplementary Figure 2**

**Full Blots for Figure 5D**

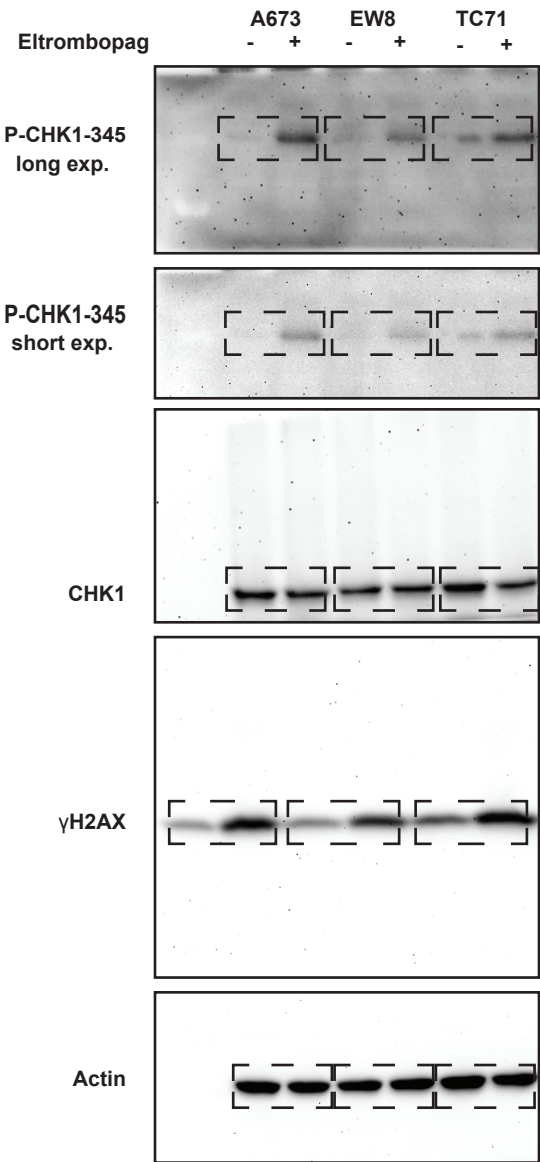

**Full Blots for Figure 6A**

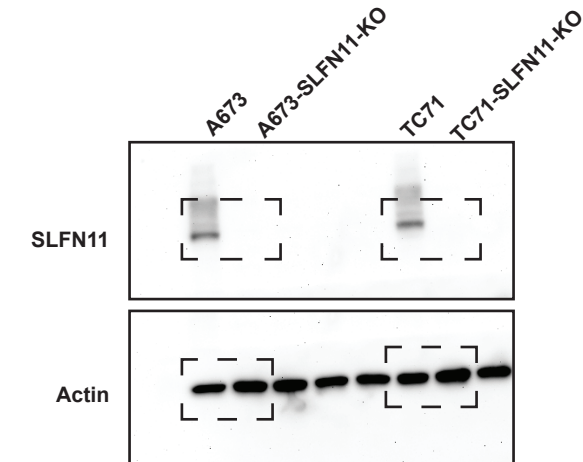

**Full Blots for Figure 6F**

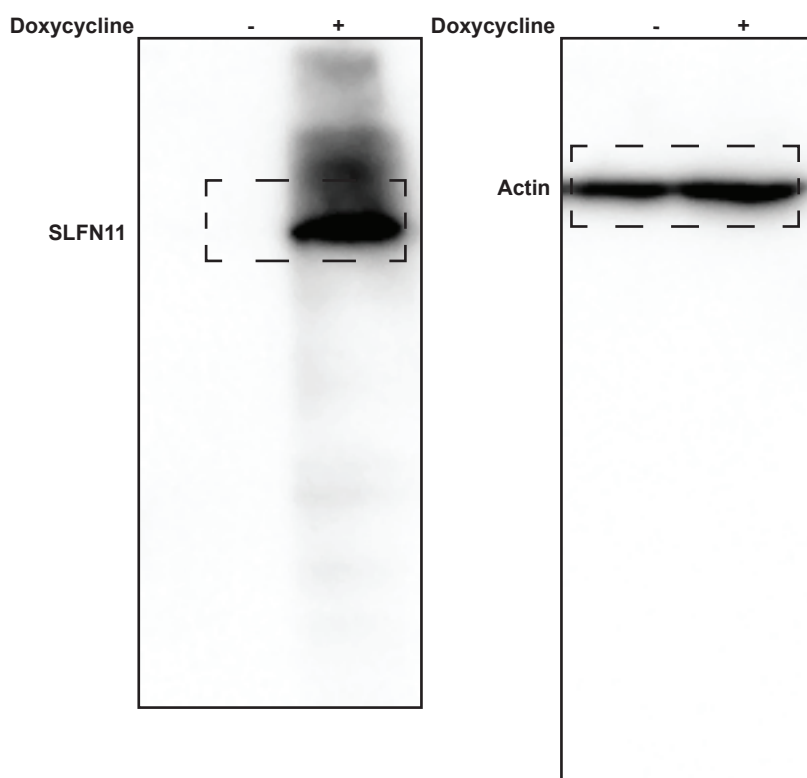

**Full Blots for Supp Figure 1.**

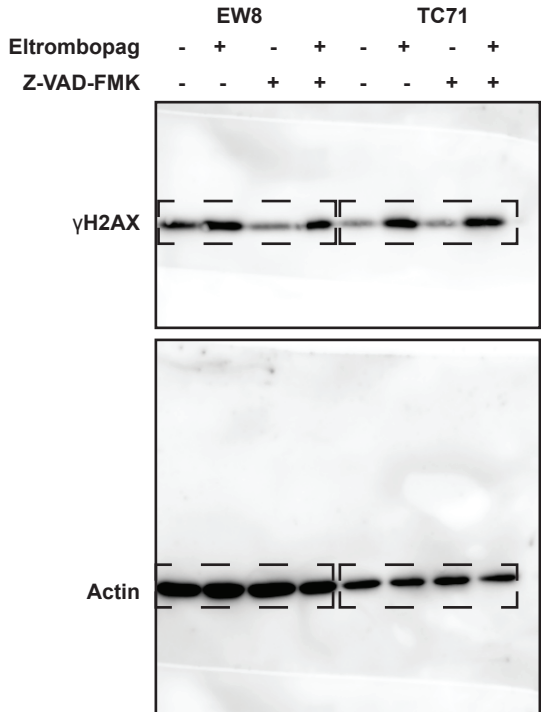

Supplement: 12885_2020_7668_MOESM2_ESM.pdf [file 12885_2020_7668_MOESM2_ESM.pdf]
